# Supplementary material for: Perception of Dental House Officers regarding Endodontic File Separation during Endodontic Treatment
Source: Hindawi journal article supplement (doi:10.1155/2023/1044541), 2023-01-01
Supplement: f1 [file 1044541.f1.pdf]

**Evaluation of Knowledge of House Officers**  
**Regarding Prevention of Endodontic**  
**Instrument Fracture during Endodontic**  
**Treatment**

**| QUESTIONNAIRE |**

Your participation in this study will be highly appreciated. Please answer all 15 questions by circling the appropriate answer of your choice where required. **All your information will be kept confidential and used only for research and educational purpose.**

**Gender: M/F**

**Age: \_\_\_\_**

**College / Institution: \_\_\_\_\_**

**Year of Graduation: \_\_\_\_\_**

- 1) In which of the following is endodontic instrument fracture more common, in your opinion?
  - a) Primary dentition
  - b) Young permanent teeth
  - c) Old permanent teeth
- 2) In your opinion ,which gender is at a higher risk of endodontic instrument fracture :
  - a) Males
  - b) Females
  - c) No bearing
- 3) In your opinion, which of the following location of a tooth can be a contributory factor for endodontic instrument fracture?
  - a) Anterior
  - b) Posterior
  - c) No bearing
- 4) Patient anxiety plays a role in endodontic instrument fracture :
  - a) True
  - b) False
- 5) Which portion of the root canal is more prone to instrument fracture?
  - a) Coronal Third
  - b) Middle Third
  - c) Apical Third
- 6) Does Expertise of the operator plays a role in the prevention of endodontic instrument fracture :
  - a) Yes
  - b) No
- 7) Does “Coronal Flare” reduce the chances of endodontic instrument fracture?
  - a) Yes
  - b) No
  - c) No bearing
- 8) Do you agree that use of “EDTA GEL” (glide) reduces risk of endodontic instrument fracture?
  - a) Yes
  - b) No
  - c) No bearing
- 9) Does cleaning of an endodontic instrument, during instrumentation of root canal, help in prevention of its fracture?
  - a) Yes
  - b) No
  - c) No bearing
- 10) Does reusing of used endodontic instrument, increases the risk of instrument fracture?
  - a) Yes

- b) No
- c) No bearing

11) Does the choice of endodontic instrument reduce the risk of instrument fracture?

- a) Yes
- b) No
- c) No bearing

12) In your opinion , which type of endodontic file , frequently breaks in the root canal :

- a) Rotary files
- b) Hand files
- c) No bearing

13) In your opinion, which type of endodontic instrument “alloy” is more frequently broken?

- a) Stainless Steel
- b) Nickel Titanium
- c) No bearing

14) In your opinion, in which phase of “Root Canal Treatment” , instruments are most likely broken?

- a) While negotiating the canal
- b) During cleaning and shaping
- c) None of the above

15) In your opinion, which of the following root canal area has the poorest prognosis of fractured instrument retrieval?

- a) Coronal Third
  - b) Middle Third
  - c) Apical Third
-
